# Supplementary material
Source: PubMed Central journal article supplement (PMC8342719)
Supplement: 11606_2021_6708_MOESM1_ESM.pdf [file 11606_2021_6708_MOESM1_ESM.pdf]

Appendix Table 1. Association of Post-Discharge Health Services Utilization within 7, 14, and 30 Days of Discharge from Index Admission with Unplanned 30-Day Readmission

|                                                                                                              | 7-day post-<br>discharge services<br>OR (95% CI) | 14-day post-<br>discharge services<br>OR (95% CI) | 30-day post-<br>discharge services<br>OR (95% CI) |
|--------------------------------------------------------------------------------------------------------------|--------------------------------------------------|---------------------------------------------------|---------------------------------------------------|
| <b>A. All index admission patients (n = 583,199)</b>                                                         |                                                  |                                                   |                                                   |
| Institutional outpatient                                                                                     | 0.74 (0.72, 0.75)                                | 0.60 (0.58, 0.61)                                 | 0.40 (0.39, 0.41)                                 |
| Office-based primary care physician                                                                          | 0.97 (0.95, 0.99)                                | 0.86 (0.85, 0.88)                                 | 0.70 (0.69, 0.72)                                 |
| Office-based specialist                                                                                      | 1.22 (1.20, 1.25)                                | 1.06 (1.04, 1.08)                                 | 0.77 (0.75, 0.79)                                 |
| Office-based non-physician provider                                                                          | 0.97 (0.95, 0.99)                                | 0.83 (0.82, 0.85)                                 | 0.72 (0.70, 0.74)                                 |
| Emergency department                                                                                         | 3.14 (3.02, 3.27)                                | 3.70 (3.57, 3.84)                                 | 4.41 (4.26, 4.56)                                 |
| Home health care                                                                                             | 0.82 (0.79, 0.84)                                | 0.79 (0.77, 0.82)                                 | 0.63 (0.61, 0.64)                                 |
| Skilled nursing facility                                                                                     | 1.00 (0.96, 1.05)                                | 1.00 (0.96, 1.04)                                 | 1.04 (1.00, 1.09)                                 |
| <b>B. Patients admitted for six conditions under the Hospital Readmission Reduction Program (n = 70,696)</b> |                                                  |                                                   |                                                   |
| Institutional outpatient                                                                                     | 0.71 (0.67, 0.75)                                | 0.56 (0.53, 0.59)                                 | 0.38 (0.36, 0.40)                                 |
| Office-based primary care physician                                                                          | 0.98 (0.94, 1.03)                                | 0.85 (0.81, 0.89)                                 | 0.65 (0.61, 0.68)                                 |
| Office-based specialist                                                                                      | 1.09 (1.04, 1.14)                                | 0.95 (0.90, 1.00)                                 | 0.67 (0.63, 0.71)                                 |
| Office-based non-physician provider                                                                          | 0.88 (0.84, 0.92)                                | 0.74 (0.71, 0.78)                                 | 0.69 (0.66, 0.73)                                 |
| Emergency department                                                                                         | 3.09 (2.83, 3.36)                                | 3.72 (3.46, 4.00)                                 | 4.22 (3.96, 4.49)                                 |
| Home health care                                                                                             | 0.89 (0.83, 0.96)                                | 0.89 (0.83, 0.95)                                 | 0.73 (0.68, 0.78)                                 |
| Skilled nursing facility                                                                                     | 0.84 (0.75, 0.95)                                | 0.83 (0.74, 0.94)                                 | 0.85 (0.75, 0.96)                                 |

Notes:

(i) In multivariable logistic models, odds ratio (OR) and 95% confidence interval (CI) were adjusted for all other explanatory variables listed in Table 2 as well as the variables listed in this table. Adjustment for the twenty most frequent index admission diagnoses was performed for all index admission patients only.

Appendix Table 2. Association of Post-Discharge Health Services Utilization within 7, 14, and 30 Days of Discharge with 30-Day Readmission Hospital Length of Stay

|                                                                                                              | 7-day post-<br>discharge services<br>APO/AME (95% CI) | 14-day post-<br>discharge services<br>APO/AME (95% CI) | 30-day post-<br>discharge services<br>APO/AME (95% CI) |
|--------------------------------------------------------------------------------------------------------------|-------------------------------------------------------|--------------------------------------------------------|--------------------------------------------------------|
| <b>A. All index admission patients (n = 583,199)</b>                                                         |                                                       |                                                        |                                                        |
| Institutional outpatient                                                                                     |                                                       |                                                        |                                                        |
| Adjusted predicted LOS with no visit                                                                         | 0.71 (0.70, 0.72)                                     | 0.76 (0.75, 0.78)                                      | 0.89 (0.88, 0.91)                                      |
| Adjusted predicted LOS with visit                                                                            | 0.56 (0.54, 0.57)                                     | 0.51 (0.50, 0.52)                                      | 0.44 (0.43, 0.45)                                      |
| AME                                                                                                          | -0.15 (-0.17, -0.14)                                  | -0.26 (-0.27, -0.24)                                   | -0.46 (-0.48, -0.44)                                   |
| Office-based primary care physician                                                                          |                                                       |                                                        |                                                        |
| Adjusted predicted LOS with no visit                                                                         | 0.69 (0.67, 0.70)                                     | 0.74 (0.73, 0.76)                                      | 0.85 (0.83, 0.87)                                      |
| Adjusted predicted LOS with visit                                                                            | 0.65 (0.64, 0.66)                                     | 0.63 (0.62, 0.64)                                      | 0.59 (0.59, 0.60)                                      |
| AME                                                                                                          | -0.04 (-0.05, -0.02)                                  | -0.12 (-0.13, -0.10)                                   | -0.26 (-0.28, -0.24)                                   |
| Office-based specialist                                                                                      |                                                       |                                                        |                                                        |
| Adjusted predicted LOS with no visit                                                                         | 0.61 (0.60, 0.62)                                     | 0.65 (0.64, 0.66)                                      | 0.79 (0.78, 0.81)                                      |
| Adjusted predicted LOS with visit                                                                            | 0.73 (0.72, 0.74)                                     | 0.68 (0.66, 0.69)                                      | 0.61 (0.60, 0.62)                                      |
| AME                                                                                                          | 0.12 (0.10, 0.13)                                     | 0.02 (0.01, 0.04)                                      | -0.18 (-0.20, -0.16)                                   |
| Office-based non-physician provider                                                                          |                                                       |                                                        |                                                        |
| Adjusted predicted LOS with no visit                                                                         | 0.67 (0.66, 0.68)                                     | 0.69 (0.68, 0.70)                                      | 0.72 (0.71, 0.73)                                      |
| Adjusted predicted LOS with visit                                                                            | 0.64 (0.62, 0.66)                                     | 0.60 (0.59, 0.62)                                      | 0.54 (0.53, 0.55)                                      |
| AME                                                                                                          | -0.02 (-0.05, 0.01)                                   | -0.09 (-0.10, -0.07)                                   | -0.18 (-0.20, -0.17)                                   |
| Emergency department                                                                                         |                                                       |                                                        |                                                        |
| Adjusted predicted LOS with no visit                                                                         | 0.63 (0.62, 0.64)                                     | 0.60 (0.59, 0.61)                                      | 0.57 (0.56, 0.58)                                      |
| Adjusted predicted LOS with visit                                                                            | 1.44 (1.38, 1.49)                                     | 1.52 (1.48, 1.57)                                      | 1.54 (1.50, 1.58)                                      |
| AME                                                                                                          | 0.81 (0.76, 0.86)                                     | 0.92 (0.87, 0.97)                                      | 0.97 (0.93, 1.01)                                      |
| Home health care                                                                                             |                                                       |                                                        |                                                        |
| Adjusted predicted LOS with no visit                                                                         | 0.69 (0.68, 0.70)                                     | 0.69 (0.68, 0.70)                                      | 0.73 (0.72, 0.74)                                      |
| Adjusted predicted LOS with visit                                                                            | 0.57 (0.55, 0.59)                                     | 0.56 (0.54, 0.58)                                      | 0.48 (0.47, 0.50)                                      |
| AME                                                                                                          | -0.11 (-0.14, -0.09)                                  | -0.13 (-0.15, -0.11)                                   | -0.24 (-0.26, -0.23)                                   |
| Skilled nursing facility                                                                                     |                                                       |                                                        |                                                        |
| Adjusted predicted LOS with no visit                                                                         | 0.67 (0.65, 0.68)                                     | 0.66 (0.65, 0.68)                                      | 0.66 (0.64, 0.67)                                      |
| Adjusted predicted LOS with visit                                                                            | 0.67 (0.64, 0.69)                                     | 0.67 (0.65, 0.70)                                      | 0.69 (0.66, 0.71)                                      |
| AME                                                                                                          | 0.00 (-0.03, 0.03)                                    | 0.01 (-0.02, 0.04)                                     | 0.03 (0.00, 0.06)                                      |
| <b>B. Patients admitted for six conditions under the Hospital Readmission Reduction Program (n = 70,696)</b> |                                                       |                                                        |                                                        |
| Institutional outpatient                                                                                     |                                                       |                                                        |                                                        |
| Adjusted predicted LOS with no visit                                                                         | 0.90 (0.87, 0.92)                                     | 0.98 (0.95, 1.01)                                      | 1.15 (1.11, 1.19)                                      |
| Adjusted predicted LOS with visit                                                                            | 0.69 (0.66, 0.73)                                     | 0.63 (0.60, 0.66)                                      | 0.55 (0.52, 0.57)                                      |
| AME                                                                                                          | -0.20 (-0.25, -0.16)                                  | -0.35 (-0.40, -0.31)                                   | -0.60 (-0.65, -0.55)                                   |
| Office-based primary care physician                                                                          |                                                       |                                                        |                                                        |
| Adjusted predicted LOS with no visit                                                                         | 0.85 (0.82, 0.89)                                     | 0.93 (0.89, 0.97)                                      | 1.10 (1.05, 1.15)                                      |
| Adjusted predicted LOS with visit                                                                            | 0.83 (0.80, 0.85)                                     | 0.79 (0.77, 0.82)                                      | 0.75 (0.72, 0.77)                                      |
| AME                                                                                                          | -0.03 (-0.07, 0.02)                                   | -0.14 (-0.19, -0.09)                                   | -0.35 (-0.40, -0.29)                                   |
| Office-based specialist                                                                                      |                                                       |                                                        |                                                        |
| Adjusted predicted LOS with no visit                                                                         | 0.81 (0.78, 0.84)                                     | 0.87 (0.84, 0.91)                                      | 1.10 (1.05, 1.15)                                      |
| Adjusted predicted LOS with visit                                                                            | 0.86 (0.83, 0.89)                                     | 0.82 (0.79, 0.84)                                      | 0.75 (0.73, 0.77)                                      |
| AME                                                                                                          | 0.05 (0.01, 0.10)                                     | -0.06 (-0.10, -0.01)                                   | -0.35 (-0.41, -0.29)                                   |

| Office-based non-physician provider  |                      |                      |                      |
|--------------------------------------|----------------------|----------------------|----------------------|
| Adjusted predicted LOS with no visit | 0.86 (0.83, 0.88)    | 0.87 (0.85, 0.90)    | 0.91 (0.88, 0.94)    |
| Adjusted predicted LOS with visit    | 0.75 (0.70, 0.79)    | 0.72 (0.68, 0.76)    | 0.66 (0.63, 0.70)    |
| AME                                  | -0.11 (-0.16, -0.05) | -0.15 (-0.20, -0.10) | -0.25 (-0.29, -0.20) |
| Emergency department                 |                      |                      |                      |
| Adjusted predicted LOS with no visit | 0.79 (0.77, 0.81)    | 0.76 (0.74, 0.78)    | 0.73 (0.70, 0.75)    |
| Adjusted predicted LOS with visit    | 1.78 (1.64, 1.93)    | 1.87 (1.75, 1.99)    | 1.78 (1.69, 1.87)    |
| AME                                  | 0.99 (0.85, 1.14)    | 1.11 (0.99, 1.23)    | 1.05 (0.96, 1.14)    |
| Home health care                     |                      |                      |                      |
| Adjusted predicted LOS with no visit | 0.86 (0.83, 0.89)    | 0.87 (0.84, 0.89)    | 0.90 (0.88, 0.93)    |
| Adjusted predicted LOS with visit    | 0.74 (0.68, 0.79)    | 0.74 (0.69, 0.78)    | 0.66 (0.62, 0.70)    |
| AME                                  | -0.13 (-0.19, -0.06) | -0.13 (-0.19, -0.07) | -0.24 (-0.29, -0.19) |
| Skilled nursing facility             |                      |                      |                      |
| Adjusted predicted LOS with no visit | 0.87 (0.83, 0.90)    | 0.87 (0.83, 0.90)    | 0.86 (0.83, 0.90)    |
| Adjusted predicted LOS with visit    | 0.75 (0.67, 0.83)    | 0.75 (0.67, 0.83)    | 0.76 (0.68, 0.83)    |
| AME                                  | -0.11 (-0.22, 0.00)  | -0.12 (-0.22, -0.01) | -0.11 (-0.21, -0.01) |

Notes:

- (i) In multivariable two-part models, adjusted predicted outcome (APO; in days), average marginal effect (AME; in days) and 95% confidence interval (CI) were adjusted for all other explanatory variables listed in Table 2 as well as the variables listed in this table. Adjustment for the twenty most frequent index admission diagnoses was performed for all index admission patients only.
- (ii) The AME represents the difference in APO (i.e., 30-day readmission hospital length of stay per IA discharge) between patients who did and did not utilize each post-discharge service.
- (iii)  $p < 0.05$  if 95% CI does not include zero.

Appendix Table 3. Association of Post-Discharge Health Services Utilization within 7, 14, and 30 Days of Discharge with 30-Day Readmission Inpatient Costs

|                                                                                                              | 7-day post-<br>discharge services<br>APO/AME (95% CI) | 14-day post-<br>discharge services<br>APO/AME (95% CI) | 30-day post-<br>discharge services<br>APO/AME (95% CI) |
|--------------------------------------------------------------------------------------------------------------|-------------------------------------------------------|--------------------------------------------------------|--------------------------------------------------------|
| <b>A. All index admission patients (n = 583,199)</b>                                                         |                                                       |                                                        |                                                        |
| Institutional outpatient                                                                                     |                                                       |                                                        |                                                        |
| Adjusted predicted cost with no visit                                                                        | 5961 (5742, 6180)                                     | 6460 (6215, 6705)                                      | 7595 (7303, 7888)                                      |
| Adjusted predicted cost with visit                                                                           | 4617 (4423, 4811)                                     | 4213 (4047, 4380)                                      | 3618 (3476, 3761)                                      |
| AME                                                                                                          | -1345 (-1516, -1173)                                  | -2246 (-2429, -2064)                                   | -3977 (-4203, -3750)                                   |
| Office-based primary care physician                                                                          |                                                       |                                                        |                                                        |
| Adjusted predicted cost with no visit                                                                        | 5760 (5521, 5998)                                     | 6226 (5963, 6490)                                      | 7102 (6799, 7406)                                      |
| Adjusted predicted cost with visit                                                                           | 5466 (5272, 5661)                                     | 5252 (5064, 5441)                                      | 4984 (4804, 5163)                                      |
| AME                                                                                                          | -293 (-457, -130)                                     | -974 (-1157, -791)                                     | -2119 (-2329, -1908)                                   |
| Office-based specialist                                                                                      |                                                       |                                                        |                                                        |
| Adjusted predicted cost with no visit                                                                        | 4710 (4544, 4876)                                     | 4927 (4745, 5108)                                      | 5928 (5698, 6158)                                      |
| Adjusted predicted cost with visit                                                                           | 6539 (6276, 6803)                                     | 6025 (5792, 6259)                                      | 5437 (5228, 5645)                                      |
| AME                                                                                                          | 1829 (1648, 2011)                                     | 1099 (934, 1263)                                       | -492 (-674, -309)                                      |
| Office-based non-physician provider                                                                          |                                                       |                                                        |                                                        |
| Adjusted predicted cost with no visit                                                                        | 5603 (5403, 5803)                                     | 5781 (5573, 5989)                                      | 6075 (5854, 6297)                                      |
| Adjusted predicted cost with visit                                                                           | 5558 (5316, 5800)                                     | 5006 (4781, 5231)                                      | 4446 (4252, 4640)                                      |
| AME                                                                                                          | -45 (-216, 126)                                       | -775 (-952, -598)                                      | -1630 (-1797, -1462)                                   |
| Emergency department                                                                                         |                                                       |                                                        |                                                        |
| Adjusted predicted cost with no visit                                                                        | 5304 (5115, 5493)                                     | 5100 (4919, 5282)                                      | 4832 (4658, 5006)                                      |
| Adjusted predicted cost with visit                                                                           | 11188 (10559, 11816)                                  | 12063 (11456, 12671)                                   | 12439 (11870, 13009)                                   |
| AME                                                                                                          | 5884 (5331, 6437)                                     | 6963 (6448, 7477)                                      | 7607 (7135, 8079)                                      |
| Home health care                                                                                             |                                                       |                                                        |                                                        |
| Adjusted predicted cost with no visit                                                                        | 5774 (5563, 5984)                                     | 5845 (5630, 6059)                                      | 6163 (5936, 6391)                                      |
| Adjusted predicted cost with visit                                                                           | 4725 (4488, 4963)                                     | 4588 (4369, 4807)                                      | 3936 (3753, 4119)                                      |
| AME                                                                                                          | -1048 (-1266, -830)                                   | -1257 (-1458, -1056)                                   | -2227 (-2410, -2044)                                   |
| Skilled nursing facility                                                                                     |                                                       |                                                        |                                                        |
| Adjusted predicted cost with no visit                                                                        | 5575 (5352, 5798)                                     | 5572 (5349, 5795)                                      | 5537 (5318, 5756)                                      |
| Adjusted predicted cost with visit                                                                           | 5631 (5316, 5945)                                     | 5640 (5328, 5952)                                      | 5729 (5414, 6045)                                      |
| AME                                                                                                          | 55 (-291, 402)                                        | 68 (-275, 411)                                         | 192 (-144, 528)                                        |
| <b>B. Patients admitted for six conditions under the Hospital Readmission Reduction Program (n = 70,696)</b> |                                                       |                                                        |                                                        |
| Institutional outpatient                                                                                     |                                                       |                                                        |                                                        |
| Adjusted predicted cost with no visit                                                                        | 7637 (7240, 8034)                                     | 8352 (7901, 8803)                                      | 9838 (9314, 10363)                                     |
| Adjusted predicted cost with visit                                                                           | 5777 (5344, 6211)                                     | 5289 (4935, 5643)                                      | 4611 (4315, 4908)                                      |
| AME                                                                                                          | -1860 (-2349, -1371)                                  | -3063 (-3536, -2590)                                   | -5227 (-5727, -4727)                                   |
| Office-based primary care physician                                                                          |                                                       |                                                        |                                                        |
| Adjusted predicted cost with no visit                                                                        | 7208 (6744, 7673)                                     | 7895 (7370, 8421)                                      | 9320 (8682, 9958)                                      |
| Adjusted predicted cost with visit                                                                           | 7014 (6644, 7384)                                     | 6706 (6360, 7053)                                      | 6305 (5981, 6629)                                      |
| AME                                                                                                          | -195 (-657, 268)                                      | -1189 (-1679, -698)                                    | -3015 (-3608, -2422)                                   |
| Office-based specialist                                                                                      |                                                       |                                                        |                                                        |
| Adjusted predicted cost with no visit                                                                        | 6250 (5882, 6617)                                     | 6665 (6234, 7096)                                      | 8253 (7684, 8822)                                      |
| Adjusted predicted cost with visit                                                                           | 7798 (7345, 8251)                                     | 7312 (6909, 7715)                                      | 6708 (6349, 7068)                                      |
| AME                                                                                                          | 1549 (1076, 2022)                                     | 647 (165, 1129)                                        | -1545 (-2121, -969)                                    |
| Office-based non-physician provider                                                                          |                                                       |                                                        |                                                        |

|                                       |                      |                      |                      |
|---------------------------------------|----------------------|----------------------|----------------------|
| Adjusted predicted cost with no visit | 7258 (6886, 7629)    | 7381 (6998, 7763)    | 7679 (7281, 8077)    |
| Adjusted predicted cost with visit    | 6372 (5833, 6911)    | 6164 (5679, 6648)    | 5600 (5177, 6023)    |
| AME                                   | -886 (-1456, -316)   | -1217 (-1742, -691)  | -2079 (-2569, -1589) |
| Emergency department                  |                      |                      |                      |
| Adjusted predicted cost with no visit | 6783 (6449, 7116)    | 6496 (6170, 6822)    | 6212 (5893, 6531)    |
| Adjusted predicted cost with visit    | 13407 (12000, 14814) | 14866 (13558, 16174) | 14478 (13422, 15534) |
| AME                                   | 6624 (5273, 7975)    | 8370 (7123, 9617)    | 8266 (7273, 9259)    |
| Home health care                      |                      |                      |                      |
| Adjusted predicted cost with no visit | 7367 (6973, 7762)    | 7400 (6997, 7802)    | 7738 (7317, 8159)    |
| Adjusted predicted cost with visit    | 6030 (5474, 6586)    | 6066 (5557, 6574)    | 5402 (4984, 5820)    |
| AME                                   | -1337 (-1985, -689)  | -1334 (-1942, -726)  | -2336 (-2877, -1795) |
| Skilled nursing facility              |                      |                      |                      |
| Adjusted predicted cost with no visit | 7336 (6869, 7804)    | 7370 (6905, 7836)    | 7351 (6892, 7809)    |
| Adjusted predicted cost with visit    | 6305 (5489, 7122)    | 6223 (5424, 7022)    | 6275 (5496, 7054)    |
| AME                                   | -1031 (-2096, 34)    | -1147 (-2189, -106)  | -1076 (-2088, -64)   |

Notes:

(i) In multivariable two-part models, adjusted predicted outcome (APO; in \$), average marginal effect (AME; in \$) and 95% confidence interval (CI) were adjusted for all other explanatory variables listed in Table 2 as well as the variables listed in this table. Adjustment for the twenty most frequent index admission diagnoses was performed for all index admission patients only.

(ii) The AME represents the difference in APO (i.e., 30-day readmission inpatient costs per IA discharge) between patients who did and did not utilize each post-discharge service.

(iii)  $p < 0.05$  if 95% CI does not include zero.
